# Supplementary material
Source: publisher figshare collection journal article supplement (https://gsapubs.figshare.com/articles/dataset/_/12541619)

Bagherpour, B., Bucher, H., Vennemann, T., Schneebeli-Hermann, E., Yuan, D.-x., Leu, M., Zhang, C., and Shen, S.-Z., 2019, Are Late Permian carbon isotope excursions of local or of global significance?: GSA Bulletin, <https://doi.org/10.1130/B31996.1>.

## Data Repository

**Supplementary File S1.** Distribution of Emeishan basalt and location of discussed sections in the text (modified from Ali et al., 2010; Huang et al., 2018). SC—South China craton; SG—Songpan-Ganzi; and NC—North China craton.

**Supplementary File S2.**  $\delta^{13}\text{C}_{\text{carb}}$ ,  $\delta^{18}\text{O}_{\text{carb}}$ ,  $\delta^{13}\text{C}_{\text{org}}$ , carbonate content, and Rock-Eval data measured at Guantan (GUA), Potuo (PUT), Layin (LAY), and Laxian (LAX) sections.

**Supplementary File S3.** Stratigraphic log of the Guantan section with  $\delta^{13}\text{C}_{\text{carb}}$ ,  $\delta^{18}\text{O}_{\text{carb}}$  and  $\delta^{13}\text{C}_{\text{carb}}$  data after removing samples with  $\delta^{18}\text{O}_{\text{carb}}$  values  $< -7$  ‰. Grey and white bands highlight different chemostratigraphic intervals.

Ali, J.R., Fitton, J.G., and Herzberg, C., 2010, Emeishan large igneous province (SW China) and the mantle-plume up-doming hypothesis: *Journal of the Geological Society*, v. 167, no. 5, p. 953–959, <https://doi.org/10.1144/0016-76492009-129>.

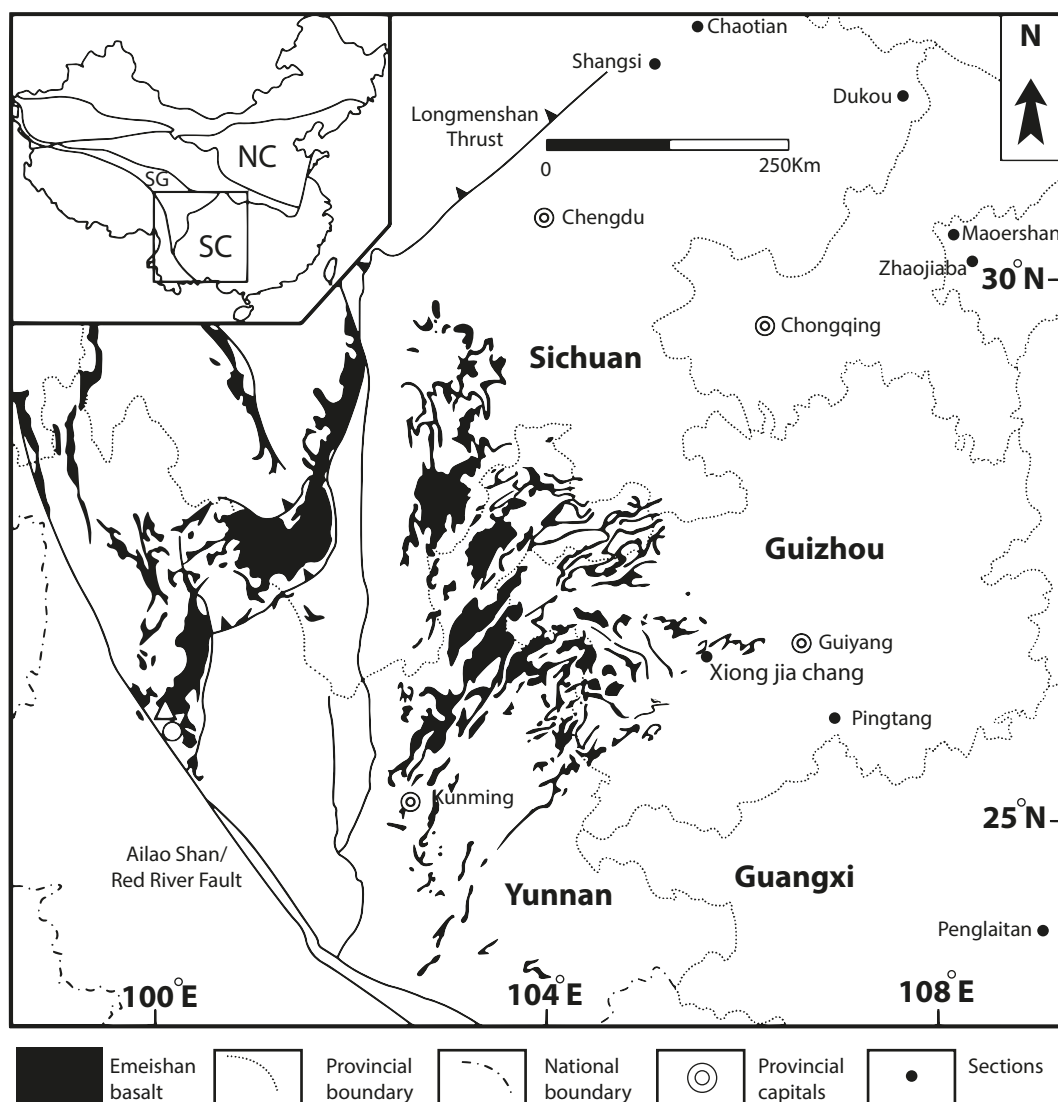

Supplementary File. S1  
 Bagherpour et al.,  
 Manuscript No. B31996

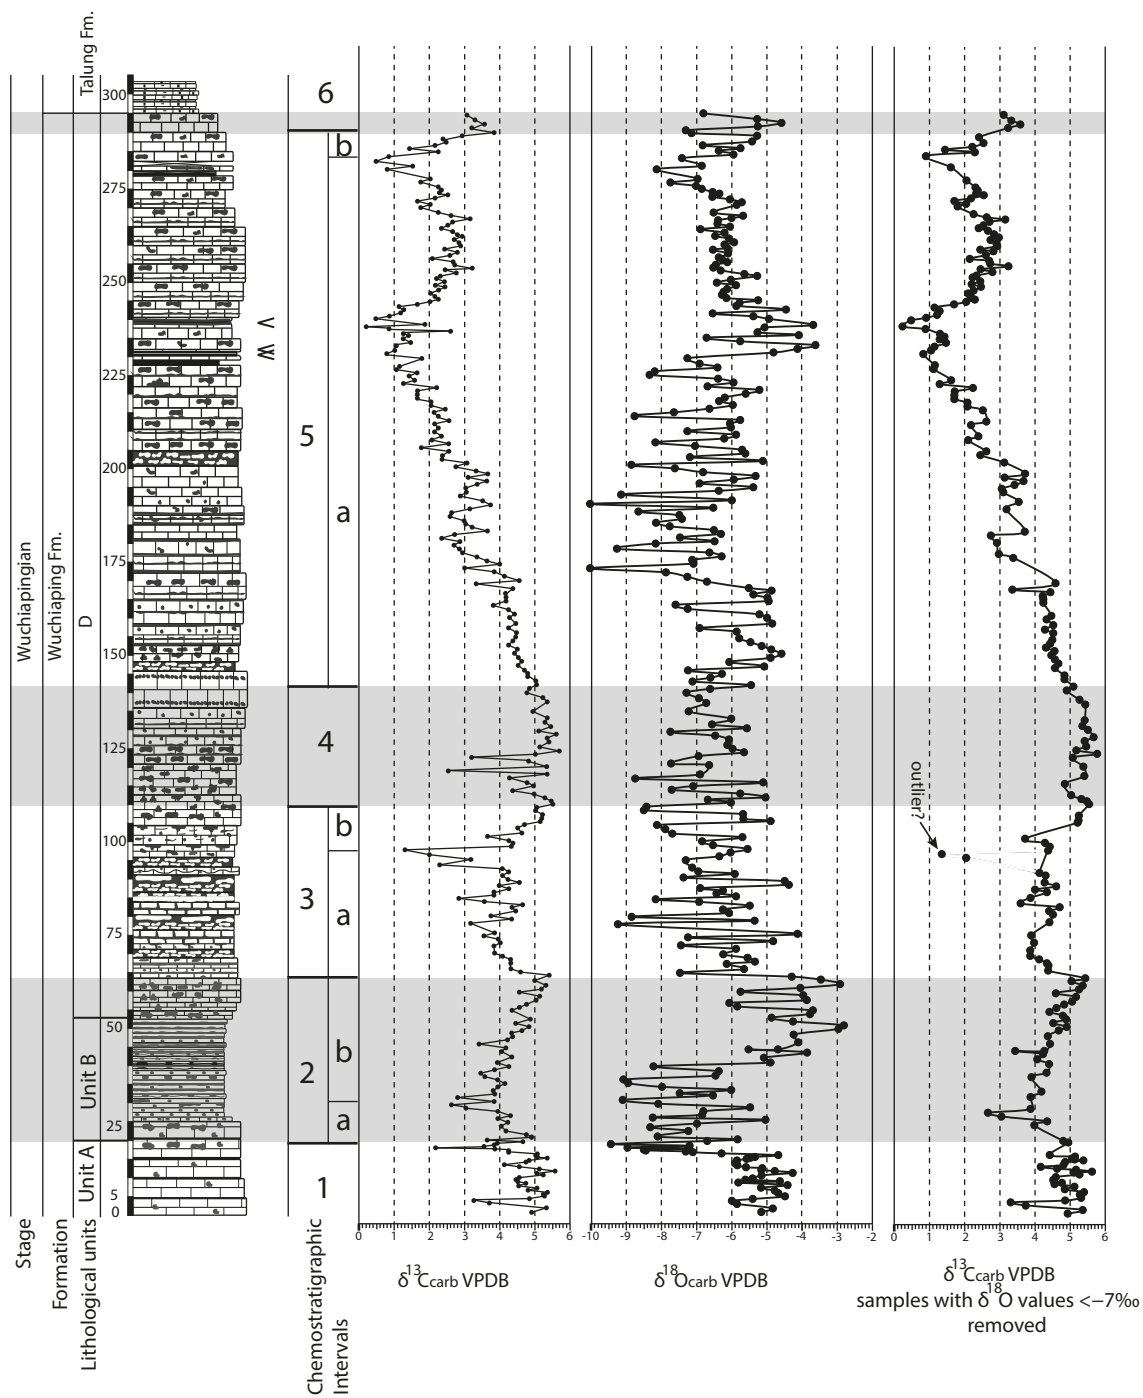

Supplement: Supplementary file 1 [file 1]
